Anesthesiology  
69:436, 1988

*In Reply:*—We join Dr. Bromage in urging extreme care in the use of epidural opiates and agree that safety must be a primary concern. However, we have not found the regular use of apnea monitors, continuous monitoring of gas exchange, or the restriction of care to expensive and crowded special units necessary to achieve it.

Although early volunteer studies gave us valuable information about the effects of intraspinal opiates, more recent prospective studies in large patient populations<sup>1,2</sup> indicate an incidence of respiratory depression comparable to that reported following the use of parenteral narcotics.<sup>3</sup> Although early reports mentioned the occurrence of sudden respiratory arrest, all recent reports of which we are aware describe slowly increasing ventilatory insufficiency. It is not clear whether effective observer training, institutional protocols, standard orders, and adequate medical supervision were established prior to the "near misses" to which Dr. Bromage refers. We have emphasized the importance of these measures for safe practice.<sup>1</sup>

Our experience now exceeds 1500 surgical patients and an additional 750 patients who received a single epidural or subarachnoid injection of morphine following cesarean section. In all cases of respiratory depression we have observed, increasing somnolence was a prominent feature. Our current monitoring practice relies heavily on well-trained nurses who check both respiratory rate and a simple bedside sedation scale hourly for the first 24 h in all patients receiving an epidural or intrathecal opiate.

We are surprised at the emphasis Dr. Bromage has placed on apnea monitors. Such devices, used on our first 1000 patients, were not as useful as expected. It is not surprising that they failed to detect our most serious cases of respiratory depression, because respiratory rate is a poor indicator of respiratory depression in patients receiving epidural opiates. This, coupled with a problem of frequent false alarms, has resulted in a decline in the use of apnea monitors in our practice.

Stenseth *et al.* reported a series of 1085 surgical patients treated with epidural morphine and subsequently monitored by human observers.<sup>2</sup> Similar to our experience in patients who developed respiratory depression, the onset of depression was gradual and the problem was recognized by nurses and effectively treated without injury or death.

We believe that some patients may be at increased risk of respiratory depression. They include elderly patients, patients with significant systemic disease, and those who have undergone extensive and/or lengthy surgery. In addition, patients who have received large doses of epidural opiate or who have been treated with parenteral opiates or other long-acting central nervous system depressants may be at extra risk. Special care should be used if these factors are present. Some of them place patients at risk for a variety of postoperative complications and increase the probability of their admission to intensive care facilities immediately after surgery whether or not epidural opiates are used.

The decision to adopt new techniques into clinical practice must be based on the balance between the benefits they offer and their risks. The efficacy of epidural opiate analgesia is established. We speculate that some of our patients who would have died are alive today because of the superior analgesia they received.<sup>4</sup> Others may have been spared serious post-surgical complications.<sup>5</sup> None were injured or killed in the course of offering that analgesia.

Without appropriate nursing education, monitoring practices, hospital protocols, standard orders, and medical supervision, epidural opiate analgesia may be dangerous. The same may be said for parenteral opiates.<sup>5</sup> We have demonstrated that the safe use of epidural opiate analgesia is possible without restricting it to high-intensity nursing areas and without routine use of apnea monitors. We do not believe our practice is one of compromise.

L. BRIAN READY, M.D., F.R.C.P.(C.)  
Associate Professor  
Director, Acute Pain Service

H. S. CHADWICK, M.D.  
Associate Professor  
Director, Obstetric Anesthesia

Department of Anesthesiology  
RN-10  
University of Washington  
Seattle, Washington 98195

## REFERENCES

1. Ready LB, Oden R, Chadwick HS, Benedetti C, Rooke GA, Caplan R, Wild LM: Development of an anesthesiology-based postoperative pain management service. *ANESTHESIOLOGY* 68:100-106, 1988
2. Stenseth R, Sellevold O, Breivik H: Epidural morphine for postoperative pain: Experience with 1085 patients. *Acta Anaesthesiol Scand* 29: 148-156, 1985
3. Miller RR, Greenblatt DJ: *Drug Effects in Hospitalized Patients*. New York, John Wiley and Sons, 1976, pp 151-152
4. Yeager MP, Glass DG, Neff RK, Brinck-Johnsen T: Epidural anesthesia and analgesia in high-risk surgical patients. *ANESTHESIOLOGY* 66:729-736, 1987
5. Rawal N, Sjostrand U, Christoffersson E, Dahlstrom B, Arvill A, Ryman H: Comparison of intramuscular and epidural morphine for postoperative analgesia in the grossly obese: influence on postoperative ambulation and pulmonary function. *Anesth Analg* 63:583-592, 1984

(Accepted for publication June 2, 1988.)

Anesthesiology  
69:436-437, 1988

## Breathing Circuit Mishap Resulting from Y-piece Disintegration

*To the Editor:*—The list of crises and near-disasters arising from mishaps with or defects of anesthesia equipment is long and diverse. Particularly worrisome are those intrinsic to the breathing circuit and its components, the disconnect or malfunction of which can lead to an

almost immediate crisis requiring instant rectification—or resuscitation. We report such an incident.

A 33-yr-old woman, ASA Physical status 1, was scheduled for excision of a ganglion cyst on her left wrist. Following midazolam 2.5 mg
